# Supplementary material for: Lyophilized Lipid Liquid Crystalline Nanoparticles as an Antimicrobial Delivery System
Source: MDPI journal article supplement (doi:10.3390/antibiotics12091405), 2023-09-04
Supplement: s1 [file s1]

## Supplementary materials

### Lyophilized lipid liquid crystalline nanoparticles as an antimicrobial delivery system.

Muhammed Awad <sup>1,2,3</sup>, Timothy J. Barnes <sup>1</sup> and Clive A. Prestidge

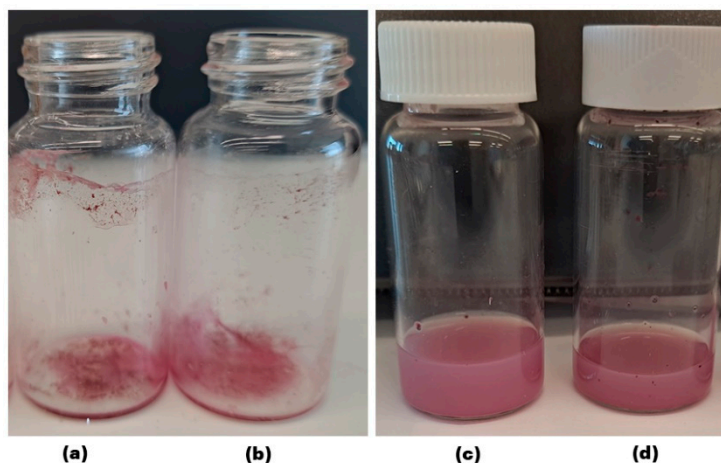

Figure S1. Illustrative images showing the physical appearance of GaPP-LCNP steaky cakes cryoprotected with 0.5% and 1% w/v trehalose following freeze-drying (a & b) respectively and the dispersions (c & d) after rehydration showing some steaky aggregates on the glass vial walls.

Table S1. Summary of z-average diameter and polydispersity index of LCNP and GaPP-LCNP before and after the lyophilization process.

| Sample                    | LCNP before freeze drying |                            | Reconstituted LCNP       |                            |
|---------------------------|---------------------------|----------------------------|--------------------------|----------------------------|
|                           | z- average diameter (nm)  | polydispersity index (PDI) | z- average diameter (nm) | polydispersity index (PDI) |
| Blank LCNP 0.5% trehalose | 160 ± 13                  | 0.28 ± 0.02                | 189 ± 7.1                | 0.23 ± 0.02                |
| Blank LCNP 1% trehalose   | 175 ± 8.6                 | 0.22 ± 0.04                | 210 ± 9.1                | 0.28 ± 0.03                |
| Blank LCNP 2% trehalose   | 185 ± 6                   | 0.21 ± 0.04                | 206 ± 10.5               | 0.23 ± 0.05                |
| Blank LCNP 5% trehalose   | 312 ± 7                   | 0.18 ± 0.14                | 418 ± 33                 | 0.36 ± 0.03                |
| GaPP-LCNP 0.5% trehalose  | 156 ± 8.5                 | 0.19 ± 0.03                | 189 ± 1.3                | 0.23 ± 0.02                |
| GaPP-LCNP 1% trehalose    | 196 ± 11.4                | 0.21 ± 0.04                | 218 ± 6.8                | 0.34 ± 0.05                |
| GaPP-LCNP 2% trehalose    | 175 ± 4                   | 0.20 ± 0.04                | 193 ± 6.5                | 0.15 ± 0.02                |
| GaPP-LCNP 5% trehalose    | 264 ± 7                   | 0.32 ± 0.05                | 312 ± 7                  | 0.35 ± 0.02                |
